# Supplementary material
Source: PubMed Central journal article supplement (PMC6359951)

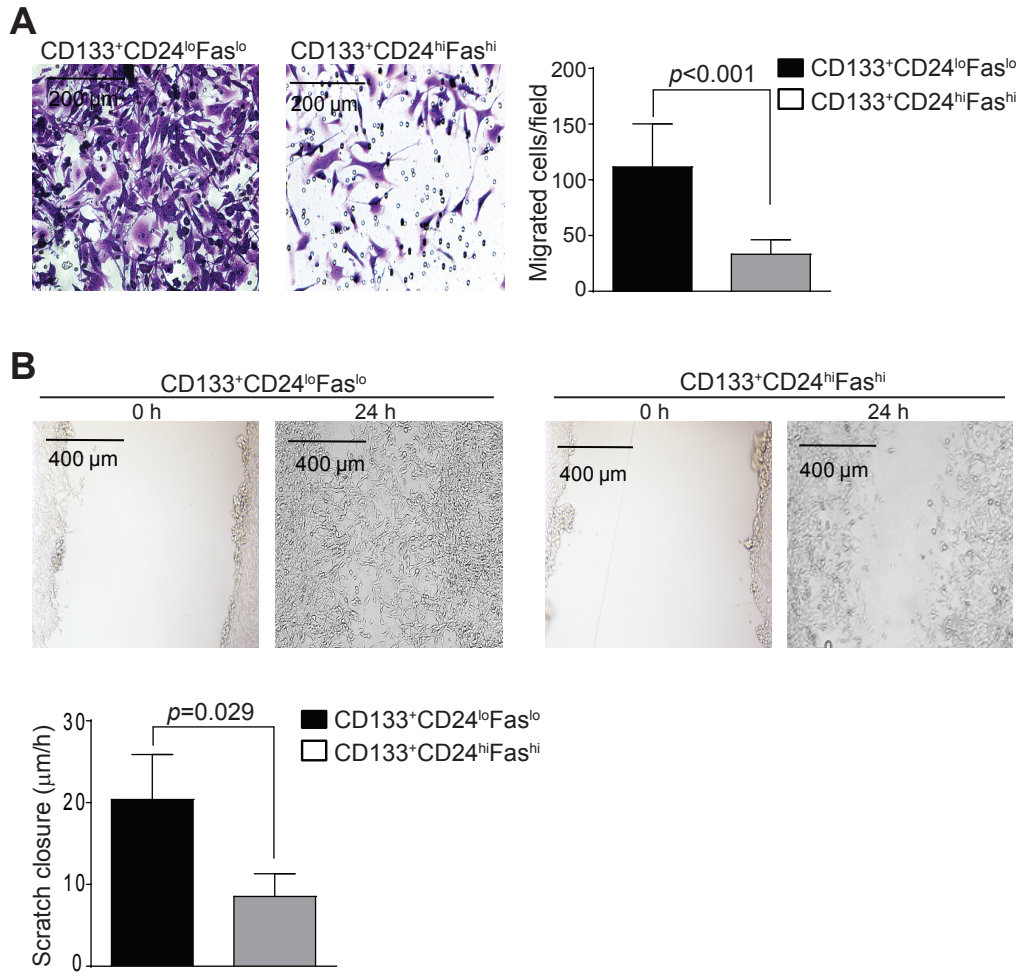

Figure S4

Supplement: NIHMS1512755-supplement-5.pdf [file NIHMS1512755-supplement-5.pdf]
